# Supplementary material for: The Effects of Antiperspirant Aluminum Chlorohydrate on the Development of Antibiotic Resistance in <i>Staphylococcus epidermidis </i>
Source: Preprints.org preprint supplement (doi:10.20944/preprints202303.0234.v1), 2023-03-13
Supplement: Supplementary file 2 [file supplementary]

| **Gene** | **Primer** | **Sequence** | **Tm (°C) / Amplicon (bp)** |
| --- | --- | --- | --- |
| *mecA* | F | GGTCCCATTAACTCTGAAG | 51 / 1039 |
| R | AGTTCTGCAGTACCGGATTTTGC |
| *gyrA* | F | TGGCTGAATTACCTCAATCA | 55 / 284 |
| R | GCCATTCTTACCATTGCTT |
| *gyrB* | F | CAGCATTAGACGTTTCAAG | 53 / 250 |
| R | CCAATACCCGTACCAAATGC |
| *parC* | F | TCGCAATGTATTCAAGTGGG | 55 / 197 |
| R | ATCGTTATCGATACTACCATT |
| *parE* | F | AAGCTCAACAAGCACGCGAGGCTG | 55 / 325 |
| R | TTAAAGTCAGTACCAACACCAGCAC |
| *norA* | F | GCTATTATCGGTGGAGGCGTG | 58 / 434 |
| R | TTTGCTTCTTTACGGCGTGAC |
| *norB/C* | F | GCAACTAACCTTGGATGGCG | 59 / 563 |
| R | ACGGTCAAGGCACTTCCGA |
| *16SrRNA* | F | TACACACCGCCCGTCACA | 55 / 535 |
| R | CTTCGACGGCTAGCTCCAAAT |

**Table S1.** The sequences of primers used for the Polymerase Chain Reaction
